# Supplementary material for: FIRM: Flexible integration of single-cell RNA-sequencing data for large-scale multi-tissue cell atlas datasets
Source: PubMed Central journal article supplement (PMC9487597; doi:10.1093/bib/bbac167), 2022-05-14
Supplement: 20220330_supplementary-table_bbac167.pdf [file 20220330_supplementary-table_bbac167.pdf]

**Supplementary Table. Problems of benchmarked methods for integration of SS2 and 10X datasets from Tabula Muris, Tabula Microcebus and Human Lung Cell Atlas.**

| Dataset           |              | Figure                | Method                |                   |                              |                                                               |                                                              |                                                                   |                             |                             |                   |
|-------------------|--------------|-----------------------|-----------------------|-------------------|------------------------------|---------------------------------------------------------------|--------------------------------------------------------------|-------------------------------------------------------------------|-----------------------------|-----------------------------|-------------------|
|                   |              |                       | scVI                  | ZINB-WaVE         | BBKNN                        | BUSseq                                                        | LIGER                                                        | Harmony                                                           | MNN                         | Scanorama                   |                   |
| Tabula Muris      | Aorta        | Supplementary Fig. 8  | inadequate mixing     | inadequate mixing |                              |                                                               |                                                              | inappropriate mixing of the cardiac muscle cells and erythrocytes |                             |                             |                   |
|                   | Bladder      | Supplementary Fig. 9  | inadequate mixing     | inadequate mixing | inadequate mixing            | inadequate mixing                                             |                                                              |                                                                   |                             |                             |                   |
|                   | Limb muscle  | Supplementary Fig. 10 | inadequate mixing     | inadequate mixing | inadequate mixing            |                                                               |                                                              |                                                                   |                             |                             |                   |
|                   | Liver        | Supplementary Fig. 11 | inadequate mixing     | inadequate mixing |                              |                                                               |                                                              |                                                                   |                             |                             |                   |
|                   | Lung         | Supplementary Fig. 12 | inadequate mixing     | inadequate mixing |                              | inadequate mixing                                             |                                                              |                                                                   |                             |                             |                   |
|                   | Mammry gland | Figure 2              | inadequate mixing     | inadequate mixing | inadequate mixing<br>low ARI |                                                               | inappropriate mixing of the B cells, macrophages and T cells |                                                                   |                             |                             |                   |
|                   | Marrow       | Supplementary Fig. 13 | inadequate mixing     | inadequate mixing |                              | discretization of the granulocytes and granulocytopenic cells |                                                              |                                                                   |                             |                             |                   |
|                   | Spleen       | Supplementary Fig. 14 |                       |                   |                              |                                                               |                                                              |                                                                   |                             | inadequate mixing           |                   |
|                   | Trachea      | Supplementary Fig. 15 |                       | inadequate mixing |                              | discretization of the mesenchymal cells                       |                                                              | discretization of the mesenchymal cells                           |                             |                             |                   |
| Tabula Microcebus | lemur 1      | Blood                 | Supplementary Fig. 16 | inadequate mixing |                              |                                                               | discretization of the neutrophils                            | discretization of the neutrophils                                 | small clusters and low ARIs |                             |                   |
|                   |              | Brain                 | Supplementary Fig. 17 | inadequate mixing |                              |                                                               |                                                              |                                                                   | small clusters and low ARIs |                             |                   |
|                   |              | Lung                  | Supplementary Fig. 18 | inadequate mixing |                              |                                                               |                                                              | discretization of the neutrophils                                 | small clusters and low ARIs |                             |                   |
|                   | lemur 2      | Bladder               | Supplementary Fig. 19 | inadequate mixing |                              |                                                               |                                                              |                                                                   |                             | small clusters and low ARIs |                   |
|                   |              | Blood                 | Supplementary Fig. 20 | inadequate mixing |                              | inadequate mixing                                             | discretization of the neutrophils                            | inappropriate mixing of the capillary cells and neutrophils       |                             |                             |                   |
|                   |              | Bone marrow           | Supplementary Fig. 21 | inadequate mixing | inadequate mixing            |                                                               |                                                              | discretization of the neutrophils                                 |                             |                             |                   |
|                   |              | Kidney                | Supplementary Fig. 22 | inadequate mixing | inadequate mixing            |                                                               |                                                              |                                                                   |                             |                             |                   |
|                   |              | Lung                  | Supplementary Fig. 23 | inadequate mixing | inadequate mixing            |                                                               | inadequate mixing                                            |                                                                   |                             |                             |                   |
|                   |              | Spleen                | Supplementary Fig. 24 | inadequate mixing | inadequate mixing            | inadequate mixing                                             | inadequate mixing                                            |                                                                   |                             |                             | inadequate mixing |
|                   |              | Bladder               | Supplementary Fig. 25 | inadequate mixing |                              |                                                               |                                                              |                                                                   |                             |                             |                   |
|                   | lemur 4      | Bone                  | Supplementary Fig. 26 | inadequate mixing | inadequate mixing            |                                                               |                                                              |                                                                   |                             |                             |                   |
|                   |              | Bone marrow           | Supplementary Fig. 27 |                   |                              |                                                               | discretization of cells of the same type                     |                                                                   |                             |                             |                   |
|                   |              | Eye retina            | Supplementary Fig. 28 | inadequate mixing |                              |                                                               | inadequate mixing                                            |                                                                   |                             |                             |                   |
|                   |              | Heart                 | Supplementary Fig. 29 |                   |                              |                                                               |                                                              |                                                                   | small clusters              |                             |                   |

|                       |         |                       |                       |                   |                   |                   |  |                                                                                                                  |                                                                              |                                                                  |                             |                   |
|-----------------------|---------|-----------------------|-----------------------|-------------------|-------------------|-------------------|--|------------------------------------------------------------------------------------------------------------------|------------------------------------------------------------------------------|------------------------------------------------------------------|-----------------------------|-------------------|
| Tabula<br>Microcebus  | lemur 4 | Kidney                | Supplementary Fig. 30 | inadequate mixing | inadequate mixing |                   |  | inappropriate mixing of the subtypes of natural killer cells and the T-cells                                     |                                                                              |                                                                  |                             |                   |
|                       |         | Liver                 | Supplementary Fig. 31 | inadequate mixing |                   |                   |  |                                                                                                                  | small clusters                                                               |                                                                  |                             |                   |
|                       |         | Pancreas              | Supplementary Fig. 32 | inadequate mixing |                   |                   |  |                                                                                                                  |                                                                              |                                                                  | small clusters and low ARIs |                   |
|                       |         | Small intestine       | Supplementary Fig. 33 | inadequate mixing | inadequate mixing |                   |  |                                                                                                                  | inappropriate mixing of the subtypes of natural killer cells and the T-cells |                                                                  |                             |                   |
|                       |         | Spleen                | Supplementary Fig. 34 | inadequate mixing | inadequate mixing |                   |  |                                                                                                                  |                                                                              | inappropriate mixing of the eosinophils and B cells              |                             | inadequate mixing |
|                       |         | Testes                | Supplementary Fig. 35 | inadequate mixing | inadequate mixing |                   |  | discretization of the pachytene spermatocytes, round spermatids, elongating spermatids, and elongated spermatids |                                                                              |                                                                  |                             |                   |
|                       |         | Tongue                | Supplementary Fig. 36 | inadequate mixing |                   |                   |  |                                                                                                                  |                                                                              | inappropriate mixing of the basal cells and the suprabasal cells |                             |                   |
| Human Lung Cell Atlas |         | Supplementary Fig. 37 | inadequate mixing     | inadequate mixing | inadequate mixing | inadequate mixing |  | inappropriate mixing of the natural killer cells and the T-cells                                                 |                                                                              |                                                                  |                             |                   |
